# Supplementary material for: Effects of Bacillus amyloliquefaciens and Bacillus pumilus on Rumen and Intestine Morphology and Microbiota in Weanling Jintang Black Goat
Source: MDPI journal article supplement (doi:10.3390/ani10091604), 2020-09-09
Supplement: s1 [file s1]

## Methods

### Sequencing

#### 1. Extraction of genome DNA

Total genome DNA from samples was extracted using CTAB/SDS method. DNA concentration and purity was monitored on 1% agarose gels. According to the concentration, DNA was diluted to 1ng/μL using sterile water.

#### 2. Amplicon Generation

16S rRNA/18SrRNA/ITS genes of distinct regions(16S V4/16S V3/16S V3-V4/16S V4-V5, 18S V4/18S V9, ITS1/ITS2, Arc V4) were amplified used specific primer(e.g. 16S V4: 515F-806R, 18S V4: 528F-706R, 18S V9: 1380F-1510R, et. al ) with the barcode. All PCR reactions were carried out with 15 μL of Phusion® High-Fidelity PCR Master Mix (New England Biolabs); 0.2 μM of forward and reverse primers, and about 10 ng template DNA. Thermal cycling consisted of initial denaturation at 98°C for 1 min, followed by 30 cycles of denaturation at 98°C for 10 s, annealing at 50°C for 30 s, and elongation at 72°C for 30 s. Finally 72°C for 5 min.

#### 3. PCR Products quantification and qualification

Mix same volume of 1X loading buffer (contained SYB green) with PCR products and operate electrophoresis on 2% agarose gel for detection. PCR products was mixed in equidensity ratios. Then, mixture PCR products was purified with Qiagen Gel Extraction Kit(Qiagen, Germany).

#### 4. Library preparation and sequencing

Sequencing libraries were generated using TruSeq® DNA PCR-Free Sample Preparation Kit (Illumina, USA) following manufacturer's recommendations and index codes were added. The library quality was assessed on the Qubit® 2.0 Fluorometer (Thermo Scientific) and Agilent Bioanalyzer 2100 system. At last, the library was sequenced on an Illumina NovaSeq platform and 250 bp paired-end reads were generated.

## Data analysis

### 1. Paired-end reads assembly and quality control

#### 1.1 Data split

Paired-end reads were assigned to samples based on their unique barcode and truncated by cutting off the barcode and primer sequence.

#### 1.2 Sequence assembly

Paired-end reads were merged using FLASH (V1.2.7, <http://ccb.jhu.edu/software/FLASH/>)<sup>[1]</sup>, a very fast and accurate analysis tool, which was designed to merge paired-end reads when at least some of the reads overlap the read generated from the opposite end of the same DNA fragment, and the splicing sequences were called raw tags.

#### 1.3 Data Filtration

Quality filtering on the raw tags were performed under specific filtering conditions to obtain the high-quality clean tags<sup>[2]</sup> according to the QIIME (V1.9.1, [http://qiime.org/scripts/split\\_libraries\\_fastq.html](http://qiime.org/scripts/split_libraries_fastq.html))<sup>[3]</sup> quality controlled process.

#### 1.4 Chimera removal

The tags were compared with the reference database (Silva database, <https://www.arb-silva.de/>) using UCHIME algorithm (UCHIME Algorithm, [http://www.drive5.com/usearch/manual/uchime\\_algo.html](http://www.drive5.com/usearch/manual/uchime_algo.html))<sup>[4]</sup> to detect chimera sequences, and then the chimera sequences were removed<sup>[5]</sup>. Then the Effective Tags finally obtained.

## 2. OTU cluster and Species annotation

### 2.1 OTU Production

Sequences analysis were performed by Uparse software (Uparse v7.0.1001 , <http://drive5.com/uparse/>)<sup>[6]</sup>. Sequences with  $\geq 97\%$  similarity were assigned to the same OTUs. Representative sequence for each OTU was screened for further annotation.

### 2.2 Species annotation

For each representative sequence, the Silva Database (<http://www.arb-silva.de/>)<sup>[7]</sup> was used based on Mothur algorithm to annotate taxonomic information.

### 2.3 Phylogenetic relationship Construction

In order to study phylogenetic relationship of different OTUs, and the difference of the dominant species in different samples(groups), multiple sequence alignment were conducted using the MUSCLE software (Version 3.8.31, <http://www.drive5.com/muscle/>)<sup>[8]</sup>.

### 2.4 Data Normalization

OTUs abundance information were normalized using a standard of sequence number corresponding to the sample with the least sequences. Subsequent analysis of alpha diversity and beta diversity were all performed basing on this output normalized data.

## 3. Alpha Diversity

Alpha diversity is applied in analyzing complexity of species diversity for a sample through 6 indices, including Observed-species, Chao1, Shannon, Simpson, ACE, Good-coverage. All this indices in our samples were calculated with QIIME(Version 1.7.0) and displayed with R software(Version 2.15.3).

Two indices were selected to identify Community richness:

Chao - the Chao1 estimator (<http://www.mothur.org/wiki/Chao>);

ACE - the ACE estimator (<http://www.mothur.org/wiki/Ace>);

Two indices were used to identify Community diversity:

Shannon - the Shannon index (<http://www.mothur.org/wiki/Shannon>);

Simpson - the Simpson index (<http://www.mothur.org/wiki/Simpson>);

One indice to characterized Sequencing depth:

Coverage - the Good's coverage (<http://www.mothur.org/wiki/Coverage>)

#### **4. Beta Diversity**

Beta diversity analysis was used to evaluate differences of samples in species complexity, Beta diversity on both weighted and unweighted unifrac were calculated by QIIME software (Version 1.9.1).

Cluster analysis was preceded by principal component analysis (PCA), which was applied to reduce the dimension of the original variables using the FactoMineR package and ggplot2 package in R software(Version 2.15.3).

Principal Coordinate Analysis (PCoA) was performed to get principal coordinates and visualize from complex, multidimensional data. A distance matrix of weighted or unweighted unifrac among samples obtained before was transformed to a new set of orthogonal axes, by which the maximum variation factor is demonstrated by first principal coordinate, and the second maximum one by the second principal coordinate, and so on. PCoA analysis was displayed by WGCNA package, stat packages and ggplot2 package in R software(Version 2.15.3).

Unweighted Pair-group Method with Arithmetic Means(UPGMA) Clustering was performed as a type of hierarchical clustering method to interpret the distance matrix using average linkage and was conducted by QIIME software (Version 1.9.1).

## Reference

- [1] Magoč T, Salzberg S L. FLASH: fast length adjustment of short reads to improve genome assemblies. *Bioinformatics* 27.21 (2011): 2957-2963.
- [2] Bokulich, Nicholas A., et al. Quality-filtering vastly improves diversity estimates from Illumina amplicon sequencing. *Nature methods* 10.1 (2013): 57-59.
- [3] Caporaso, J. Gregory, et al. QIIME allows analysis of high-throughput community sequencing data. *Nature methods* 7.5 (2010): 335-336.
- [4] Edgar, Robert C., et al. UCHIME improves sensitivity and speed of chimera detection. *Bioinformatics* 27.16 (2011): 2194-2200.
- [5] Haas, Brian J., et al. Chimeric 16S rRNA sequence formation and detection in Sanger and 454-pyrosequenced PCR amplicons. *Genome research* 21.3 (2011): 494-504.
- [6] Edgar, Robert C. UPARSE: highly accurate OTU sequences from microbial amplicon reads. *Nature methods* 10.10 (2013): 996-998.
- [7] Quast C, Pruesse E, et al. The SILVA ribosomal RNA gene database project: improved data processing and web-based tools[J]. *Nucl. Acids Res.* (2013): D590-D596.
- [8] Edgar R C. MUSCLE: multiple sequence alignment with high accuracy and high throughput. *Nucleic acids research* 32.5(2004): 1792-1797.
